# Supplementary material
Source: PubMed Central journal article supplement (PMC8704166)

## Supplemental Online Content

Taylor DB, Osazuwa-Peters OL, Okafor SI, et al. Differential outcomes among survivors of head and neck cancer belonging to racial and ethnic minority groups. *JAMA Otolaryngol–Head Neck Surg*. Published online December 23, 2021. doi:10.1001/jamaoto.2021.3425

**eTable 1.** Test of proportional hazards assumption using Schoenfeld residual test on multivariable overall survival model

**eTable 2.** Test of proportional hazards assumption using Schoenfeld residual test on Fine and Gray model

**eTable 3.** Test of proportional odds assumption using Brant test in R (package brant; function brant); proportional odds assumption violated when  $P < 0.05$

**eFigure.** Consort diagram for HNC study cohort as abstracted from SEER 18 database from 2007 through 2016

This supplemental material has been provided by the authors to give readers additional information about their work.

eTable 1: Test of proportional hazards assumption using Schoenfeld residual test on multivariable overall survival model

|              | <b>Chisquare</b> | <b>df</b> | <b>P</b> |
|--------------|------------------|-----------|----------|
| Race         | 13.11            | 3         | 0.004    |
| Age          | 24.97            | 1         | <0.001   |
| Marital      | 18.71            | 1         | <0.001   |
| Insurance    | 5.74             | 2         | 0.057    |
| Region       | 2.96             | 3         | 0.398    |
| Cancer site  | 29.99            | 4         | <0.001   |
| Stage        | 88.33            | 3         | <0.001   |
| Sex          | 0.63             | 1         | 0.428    |
| SES          | 1.07             | 3         | 0.784    |
| Chemotherapy | 407.47           | 1         | <0.001   |
| Radiation    | 808.32           | 1         | <0.001   |
| Surgery      | 118.32           | 1         | <0.001   |
| GLOBAL       | 1439.81          | 24        | <0.001   |

eTable 2: Test of proportional hazards assumption using Schoenfeld residual test on Fine and Gray model

|              | <b>Chisquare</b> | <b>df</b> | <b>P</b> |
|--------------|------------------|-----------|----------|
| Age          | 76.14            | 1         | <0.001   |
| Sex          | 0.01             | 1         | 0.937    |
| Race         | 31.67            | 3         | <0.001   |
| Marital      | 43.24            | 1         | <0.001   |
| Insurance    | 4.69             | 2         | 0.096    |
| Region       | 6.54             | 3         | 0.088    |
| SES          | 9.45             | 3         | 0.024    |
| Stage        | 82.49            | 3         | <0.001   |
| Cancer site  | 37.89            | 4         | <0.001   |
| Chemotherapy | 406.38           | 1         | <0.001   |
| Radiation    | 761.49           | 1         | <0.001   |
| Surgery      | 145.44           | 1         | <0.001   |
| GLOBAL       | 1452.74          | 24        | <0.001   |

eTable3. Test of proportional odds assumption using Brant test in R (package brant; function brant); proportional odds assumption violated when  $P < 0.05$

|                   | <b>Chisquare</b> | <b>df</b> | <b>probability</b> |
|-------------------|------------------|-----------|--------------------|
| Omnibus           | 33.20            | 14        | 0.003              |
| Age               | <b>6.57</b>      | <b>1</b>  | <b>0.01</b>        |
| Race              |                  |           |                    |
| NH Black          | Reference        |           |                    |
| Hispanic          | 0.82             | 1         | 0.364              |
| Asian             | 3.17             | 1         | 0.075              |
| American Indian   | 3.42             | 1         | 0.064              |
| Sex               |                  |           |                    |
| Female            | Reference        |           |                    |
| Male              | 2.71             | 1         | 0.1                |
| Insurance         |                  |           |                    |
| Private insurance | Reference        |           |                    |
| Medicaid          | 2.34             | 1         | 0.126              |
| Uninsured         | 2.87             | 1         | 0.09               |
| Region            |                  |           |                    |
| South             | Reference        |           |                    |
| West              | <b>5.77</b>      | <b>1</b>  | <b>0.016</b>       |
| Northeast         | 2.01             | 1         | 0.156              |
| Midwest           | 0.50             | 1         | 0.481              |
| Medium            | 0.76             | 1         | 0.384              |
| SES               |                  |           |                    |
| High              | Reference        |           |                    |
| Low               | 0.87             | 1         | 0.35               |
| Very low          | 0.48             | 1         | 0.49               |
| Marital status    |                  |           |                    |
| Married           | Reference        |           |                    |
| Unmarried         | 0.41             | 1         | 0.523              |

eFigure 1. Consort diagram for HNC study cohort as abstracted from SEER 18 database from 2007 through 2016

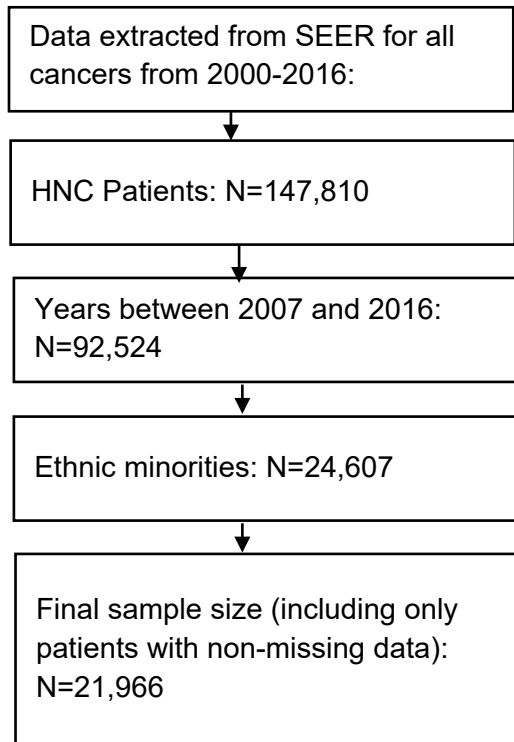

Supplement: jamaotolaryngolheadnecksurg-e213425-s001.pdf [file jamaotolaryngolheadnecksurg-e213425-s001.pdf]
